# Supplementary material
Source: publisher site journal article supplement (https://www.spandidos-publications.com/4134/downloadSupplementary)

Figure S1. *VDR KO* mouse verification. Blood samples from *VDRKO* and WT mice were obtained from mice tails. VDR protein expression was detected using western blotting analysis. GAPDH protein expression was used as a control to normalize VDR expression. VDR, vitamin D receptor; KO, knockout/*VDR*<sup>-/-</sup>; WT, wild-type/*VDR*<sup>+/+</sup>; NC, negative control.

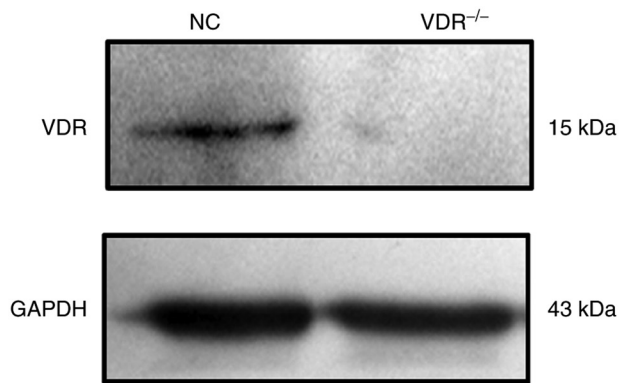

Supplement: Supplementary file 1 [file downloadSupplementary]
